# Supplementary material for: Spinel LiMn2O4 as a Capacitive Deionization Electrode Material with High Desalination Capacity: Experiment and Simulation
Source: MDPI journal article supplement (doi:10.3390/ijerph20010517), 2022-12-28
Supplement: s1 [file s1]

# Supporting Information

## Spinel $\text{LiMn}_2\text{O}_4$ as a Capacitive Deionization Electrode

### Material with High Desalination Capacity:

### Experiment and Simulation

**Yuxin Jiang**<sup>1</sup>, **Ken Li**<sup>1</sup>, **Sikpaam Issaka Alhassan**<sup>2</sup>, **Yiyun Cao**<sup>1</sup>, **Haoyu Deng**<sup>1</sup>,  
**Shan Tan**<sup>1</sup>, **Haiying Wang**<sup>1,3,4,\*</sup>, **Chongjian Tang**<sup>1,3,4,\*</sup>, and **Liyuan Chai**<sup>1,3,4</sup>

<sup>1</sup> School of Metallurgy and Environment, Central South University, Changsha 410083, China

<sup>2</sup> College of Engineering, Chemical and Environmental Engineering Department, University of Arizona, Tucson, AZ 85721, USA

<sup>3</sup> Chinese National Engineering Center for Control and Treatment of Heavy Metal Pollution, Changsha 410083, China

<sup>4</sup> Water Pollution Control Technology Key Lab of Hunan Province, Changsha 410083, China

\* Corresponding authors.

Email addresses: haiyw25@csu.edu.cn (Haiying Wang)

chjtang@csu.edu.cn (Chongjian Tang)

## 1. Simulation

The controlling equations are the mathematical foundation of the simulation. The mass balance of dilute matter in the solution could be depicted by Eq. S1:

$$\frac{\partial i}{\partial t} + \nabla \cdot \mathbf{N}_i = R_{i,tot} \quad (\text{S1})$$

in which  $c_i$  represents of concentration of the ion  $i$ ,  $t$  denotes the reaction time,  $N_i$  is the total flux of the matter  $i$ . The flux in the electrolyte was calculated with Nernst-Planck Equation Eq. S2:

$$\mathbf{N}_i = -D_i \nabla_i - Z_i u_{m,i} F c_i \nabla \phi_i + c_i \mathbf{u} = \mathbf{J}_i + c_i \mathbf{u} \quad (\text{S2})$$

where the first, second, and third terms on the left side refer to diffusion, immigration and convection,  $c_i$  represents of concentration of the ion  $i$ ,  $Z_i$  is the valence of the ion,  $D_i$  refers to the diffusion coefficient,  $u_{m,i}$  denotes the transfer rate of the ion,  $F$  demonstrates the Faraday constant ( $96485 \text{ C} \cdot \text{mol}^{-1}$ ),  $\phi_i$  stands for the potential of the solution,  $\mathbf{u}$  represents the velocity vector and  $\mathbf{J}_i$  denotes the mole flux of relative transfer. The calculation of  $\mathbf{J}_i$  is in the following equation:

$$\mathbf{J}_i = -D_i \nabla_i - Z_i u_{m,i} F c_i \nabla \phi_i \quad (\text{S3})$$

Electrostatic current density could be calculated by summing the fluxes:

$$i_l = F \sum Z_i \mathbf{N}_i + F \mathbf{J}_H - F \mathbf{J}_{OH} \quad (\text{S4})$$

in which  $i_l$  is the current density vector in the electrolyte,  $\mathbf{J}_H$  and  $\mathbf{J}_{OH}$  denote the mole fluxes of  $\text{H}^+$  and  $\text{OH}^-$ , respectively. Since the electrolysis of water was introduced, the mole fluxes of  $\text{H}^+$  and  $\text{OH}^-$  were calculated with the equations below:

$$\mathbf{J}_H = -D_H \nabla_{c_H} - u_{m,H} F c_H \nabla \phi_i \quad (\text{S5})$$

$$\mathbf{J}_{OH} = -D_{OH} \nabla_{c_{OH}} - u_{m,OH} F c_{OH} \nabla \phi_i \quad (\text{S6})$$

where  $c_H$  represents of concentration of  $\text{H}^+$ ,  $c_{OH}$  represents of concentration of  $\text{OH}^-$ . The electric neutrality of the solution was controlled by Eq. S7:

$$\sum Z_i c_i + c_H - c_{OH} = 0 \quad (\text{S7})$$

To enhance the accuracy of the calculation, Eq. S2 was combined with the Poisson Equation Eq. (S8):

$$\nabla^2 \varphi = f \quad (\text{S8})$$

in which  $\varphi$  and  $f$  are real or complex-valued functions on a manifold. There were

no more other matters in the experiment, so we set all the boundaries in the model (except for both sides of the membrane) as no-flux boundary conditions with the following controlling equation:

$$-n \cdot J_i = 0 \quad (\text{S9})$$

where  $n$  is normal vector of the boundary pointing into the domain. Furthermore, all the boundaries except the cathode and anode plates were set to be insulated as shown in Eq. S10:

$$-n \cdot i_l = 0 \quad -n \cdot i_s = 0 \quad (\text{S10})$$

in which  $i_l$  and  $i_s$  denote the current density vectors of electrolyte and electrode, respectively. There was positive charge on the ion exchange membrane and the mass/volume fraction of the electrolyte was 0.6. There is no convection because the solutions are static. The parameters of the model are presented in Table S1, where the exchange current densities of the electrodes were measured with the electrochemical workstation (Multi autolab/M204, Metrohm, Switzerland).

**Table S1** Parameters of the simulation model

| Symbol              | Significance                                       | Value                                                  | Reference             |
|---------------------|----------------------------------------------------|--------------------------------------------------------|-----------------------|
| T                   | experimental temperature                           | 298.15 K                                               | assumed               |
| D-Li <sup>+</sup>   | diffusion coefficient of Li <sup>+</sup>           | $1.334 \times 10^{-9} \text{ m}^2 \cdot \text{s}^{-1}$ | (Seader et al., 1998) |
| D-Cl <sup>-</sup>   | diffusion coefficient of Cl <sup>-</sup>           | $2.031 \times 10^{-9} \text{ m}^2 \cdot \text{s}^{-1}$ | (Seader et al., 1998) |
| D-Na <sup>+</sup>   | diffusion coefficient of Na <sup>+</sup>           | $1.030 \times 10^{-9} \text{ m}^2 \cdot \text{s}^{-1}$ | (Seader et al., 1998) |
| i <sub>0</sub> -C   | exchange current density of the anode              | $0.004486 \text{ A} \cdot \text{m}^{-2}$               | measured              |
| i <sub>0</sub> -LMO | exchange current density of the cathode            | $0.002258 \text{ A} \cdot \text{m}^{-2}$               | measured              |
| $\alpha_a$          | anodic transfer coefficient of faradaic reaction   | 0.5                                                    | (Wu et al., 2014)     |
| $\alpha_c$          | cathodic transfer coefficient of faradaic reaction | 0.5                                                    | (Wu et al., 2014)     |

## 2. Deionization test

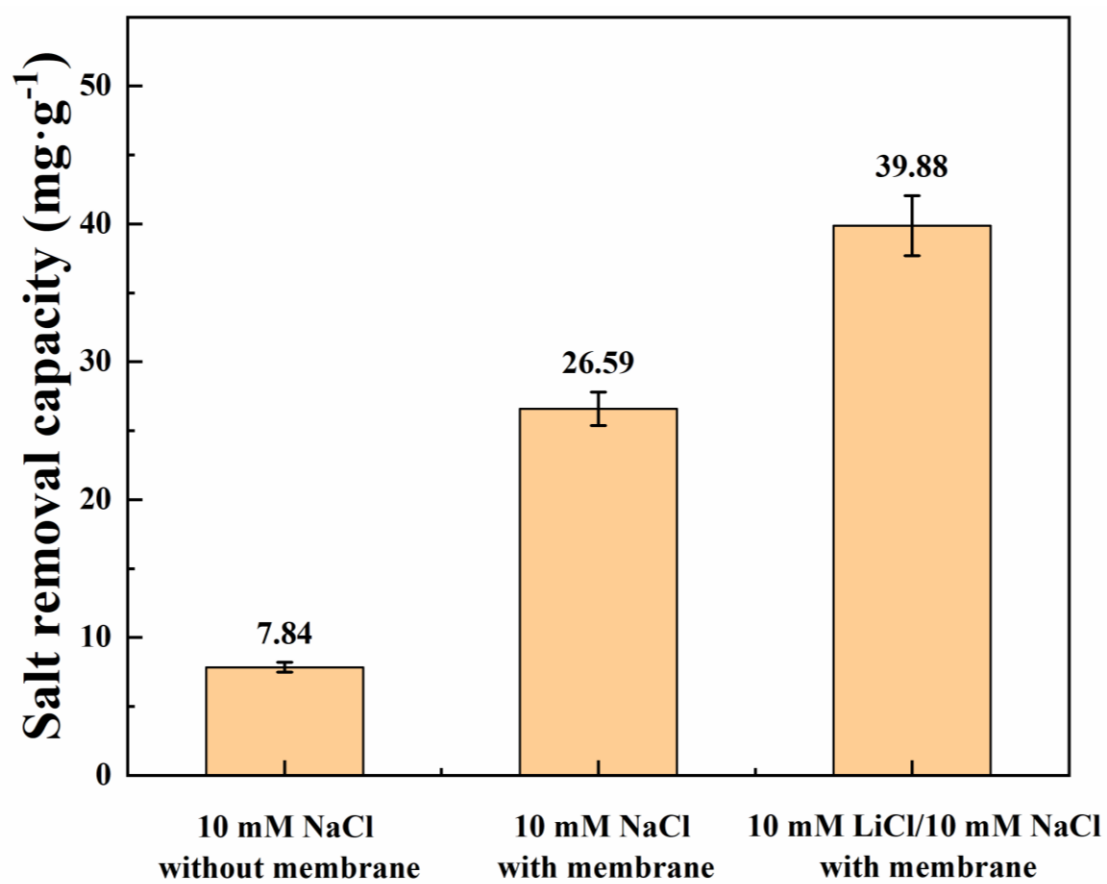

**Figure S1.** Comparison of the desalination capacities of different CDI cells containing only activated carbon electrodes.

### 3. Characterization

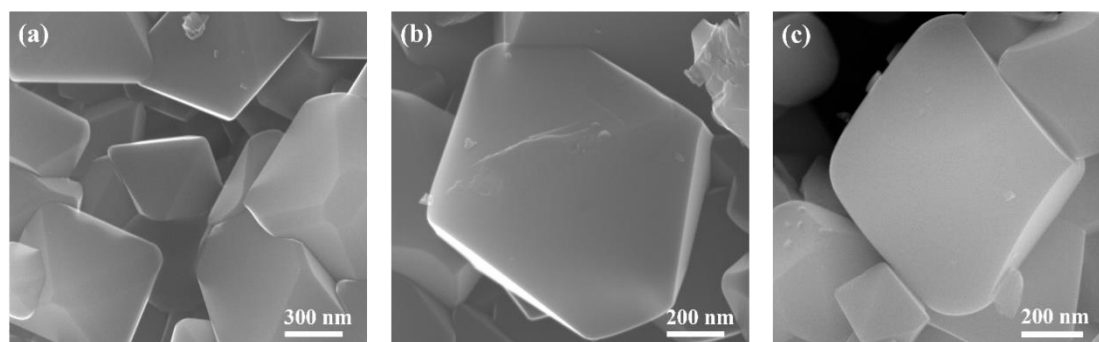

**Figure S2.** FESEM images of spinel  $\text{LiMn}_2\text{O}_4$ .

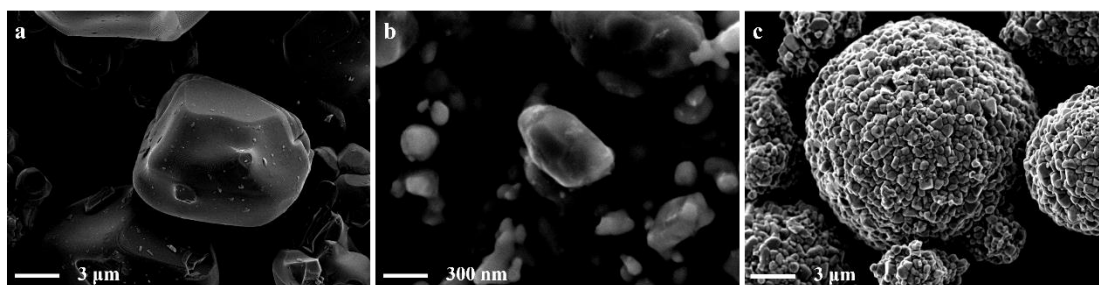

**Figure S3.** Field emission scanning electron microscope images of (a)  $\text{LiCoO}_2$ , (b)  $\text{LiFePO}_4$ , and (c)  $\text{LiNi}_{0.5}\text{Mn}_{0.3}\text{Co}_{0.2}\text{O}_2$ .

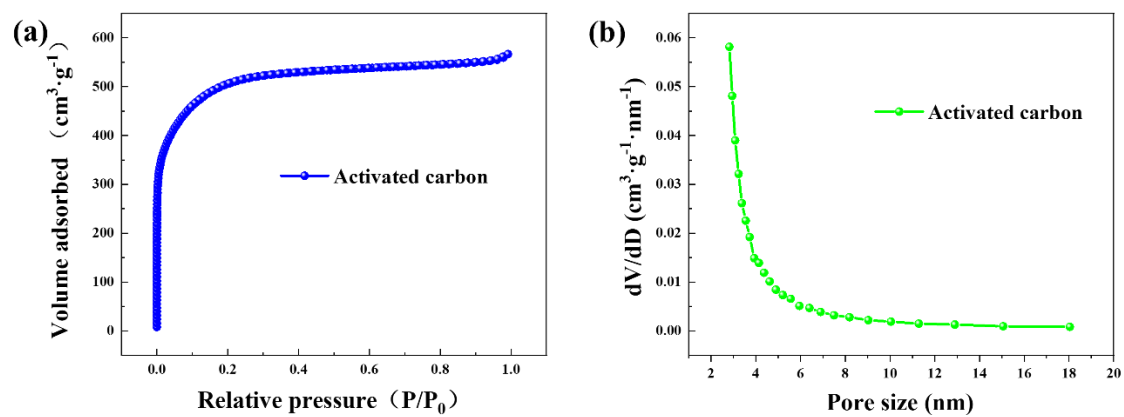

**Figure S4.** (a) N<sub>2</sub> adsorption/desorption curve and (b) pore size distribution of the activated carbon.

## References

Seader, J D, Henley, E J, Roper, D K, 1998. Separation process principles. wiley New York.

Wu, W, Wang, L, Li, Y, Zhang, F, Lin, L, Niu, S, Chenet, D, Zhang, X, Hao, Y, Heinz, T F, 2014. Piezoelectricity of single-atomic-layer MoS<sub>2</sub> for energy conversion and piezotronics. Nature 514, 470-474.
